# Supplementary material for: Development and validation of a genomic mutation signature to predict response to PD-1 inhibitors in non-squamous NSCLC: a multicohort study
Source: PubMed Central journal article supplement — J Immunother Cancer. 2020 Jun 30;8(1):e000381. doi: 10.1136/jitc-2019-000381 (PMC7328897; doi:10.1136/jitc-2019-000381), 2020-06-30
Supplement: jitc-2019-000381supp001.pdf [file jitc-2019-000381supp001.pdf]

**Table S1.** Demographic and clinicopathologic characteristics of non-squamous non-small cell lung cancer in three cohorts treated with anti-PD-(L1) based therapy.

| Characteristics          | MSK cohort  |                     | External Validation |
|--------------------------|-------------|---------------------|---------------------|
|                          | Training    | Internal Validation |                     |
| <b>No. of patients</b>   | 123         | 82                  | 111                 |
| <b>Age</b>               |             |                     |                     |
| Mean, years              | 64.0        | 66.0                | 63.0                |
| Range                    | 31 – 92     | 22 – 88             | 41 – 87             |
| <b>Gender</b>            |             |                     |                     |
| Male                     | 56 (45.5)   | 36 (43.9)           | 42 (37.8)           |
| Female                   | 67 (54.5)   | 46 (56.1)           | 69 (62.2)           |
| <b>Smoking</b>           |             |                     |                     |
| Never                    | 26 (21.1)   | 15 (18.3)           | 16 (14.4)           |
| Current/Former           | 97 (78.9)   | 67 (81.7)           | 85 (76.6)           |
| <b>Clinicopathology*</b> |             |                     |                     |
| Adenocarcinoma           | 112(91.06%) | 74 (90.24%)         | 50 (45.05%)         |
| LCNE                     | 4 (3.25%)   | 3 (3.66%)           | -                   |
| NSCLC (NOS)              | 7 (5.69%)   | 5 (6.10%)           | 2 (1.8%)            |
| <b>Treatment line</b>    |             |                     |                     |
| 1 <sup>st</sup>          | 22 (17.9)   | 22 (26.8)           | 67 (60.4)           |
| ≥ 2 <sup>nd</sup>        | 101 (82.1)  | 60 (73.2)           | 44 (39.6)           |
| <b>Treatment type</b>    |             |                     |                     |
| Monotherapy              | 109 (88.6)  | 65 (79.3)           | 52 (46.8%)          |
| Combination              | 14 (11.4)   | 17 (20.7)           | 59 (53.2%)          |
| <b>Clinical trial</b>    |             |                     |                     |
| Yes                      | 24 (19.5)   | 22 (26.8)           | 111 (100%)          |
| No                       | 99 (80.5)   | 60 (73.2)           | 0                   |
| <b>PD-L1 expression</b>  |             |                     |                     |
| ≥ 50%                    | 6 (4.9)     | 11 (13.4)           | 17 (15.3)           |
| 1%-49%                   | 13 (10.6)   | 6 (7.3)             | 40 (36.1)           |
| <1%                      | 23 (18.7)   | 15 (12.3)           | 25 (22.5)           |
| Unknown                  | 81 (65.8)   | 50 (61.0)           | 29 (26.1)           |
| <b>Clinical benefit</b>  |             |                     |                     |
| Durable clinical benefit | 31 (25.2)   | 29 (35.4)           | 50 (45.0)           |
| No clinical benefit      | 87 (70.7)   | 48 (58.5)           | 59 (53.2)           |
| Unknown                  | 5 (4.1)     | 5 (6.1)             | 24 (1.8)            |
| <b>GMS status</b>        |             |                     |                     |
| High (>0.565)            | 37 (30.1)   | 24 (29.3)           | 34 (30.6)           |
| Low (≤0.565)             | 86 (69.9)   | 58 (70.7)           | 77 (69.4)           |

Abbreviations: GMS, genomic mutation signature; PD-L1, Programmed cell death ligand 1; MSK, Memorial Sloan Kettering; LCNE, large-cell neuroendocrine carcinoma; NSCLC, non-small-cell lung cancer; NOS, nototherwise specified.

\*Patients in the checkpoint 012 cohort were registered as “non-squamous”, data of detailed pathological types were not available.
