# Supplementary material for: Development and validation of a genomic mutation signature to predict response to PD-1 inhibitors in non-squamous NSCLC: a multicohort study
Source: PubMed Central journal article supplement — J Immunother Cancer. 2020 Jun 30;8(1):e000381. doi: 10.1136/jitc-2019-000381 (PMC7328897; doi:10.1136/jitc-2019-000381), 2020-06-30
Supplement: jitc-2019-000381supp002.pdf [file jitc-2019-000381supp002.pdf]

## Supplementary Figure legends

**Fig S1. Flowchart of the procedures in the development and validation of genomic mutation signature.** GMS, genomic mutation signature; MSK, Memorial Sloan Kettering; TCGA, The Cancer Genome Atlas; ICIs, immune-checkpoint inhibitors; ORR, objective response rate.

**Fig S2. Relationship between GMS score and treatment response to anti-PD-(L1) therapy.** The association of GMS score with progression-free survival time and objective response rate in (A) MSK training cohort and (B) MSK internal validation cohort respectively. Vertical and horizontal dashed line were indicated as GMS cut-point (0.565) and progression-free survival  $\geq 6$  months (durable clinical benefit) respectively. GMS, genomic mutation signature; MSK, Memorial Sloan Kettering

**Fig S3. (A) A Venn diagram showing the overlap patients with GMS > cut-point (0.565) and PD-L1 IHC  $\geq 50\%$ ; (B) A Venn diagram showing the overlap patients with GMS > cut-point (0.565) and TMB  $\geq$  upper quartile.**

**Fig S4. Kaplan-Meier estimates of progression-free survival classified by the status of GMS and PD-L1 in (A) MSK cohort and (B) external validation cohorts.** GMS<sup>high</sup> PD-L1<sup>low</sup> group and GMS<sup>low</sup> PD-L1<sup>high</sup> group were discriminated.

**Fig S5. Relationship between GMS and TMB.**

The correlation analysis between GMS and TMB in (A) MSK and (B) external validation cohort respectively. The spearman correlation coefficient and *P* value are shown. TMB, tumor mutation burden; GMS, genomic mutation signature; MSK, Memorial Sloan Kettering

**Fig S6. Kaplan-Meier estimates of progression-free survival classified by the status of two markers (A, GMS and TMB) and three markers (B, GMS, PD-L1, and TMB).**

Note: 2/3 markers (+) denotes these three situations:  $GMS^{high}TMB^{high}PD-L1^{low}$ ,  $GMS^{high}TMB^{low}PD-L1^{high}$ ,  $GMS^{low}TMB^{high}PD-L1^{high}$ ; 1/3 markers (+) denotes these three situations:  $GMS^{high}TMB^{low}PD-L1^{low}$ ,  $GMS^{low}TMB^{low}PD-L1^{high}$ ,  $GMS^{low}TMB^{high}PD-L1^{low}$ .

**Fig S7. Survival analysis in MSK training cohort and MSK internal validation cohort using the optimal cutoff determined by ROC method.** (A) Receiver–operating characteristic (ROC) curves in the MSK training cohort. The optimal cutoff value was determined by Youden Index. Kaplan-Meier curves of progression-free survival according to GMS status in (B) MSK training cohort and (C) MSK internal validation cohort. Kaplan-Meier curves of overall survival according to GMS status in (D) MSK training cohort and (E) MSK internal validation cohort. GMS, genomic mutation signature; MSK, Memorial Sloan Kettering.

**Fig S8. Parsimony analysis of GMS in the training, internal validation and external validation cohorts.** Kaplan-Meier curves of progression free survival and overall survival of (A) a three-gene model, whose members (MLL3/KMT2C, SMAD4 and HGF) achieve  $P \leq 0.05$  in the multivariate Cox regression analysis, and (B) a four-gene model developed with four well-established genes (TP53, KRAS, EGFR and STK11). GMS, gene mutation-based signature.

**Fig S9. Kaplan-Meier estimates of progression-free survival classified by the status of GMS in all the CR/PR cases.**
