# Supplementary material for: Development and validation of a genomic mutation signature to predict response to PD-1 inhibitors in non-squamous NSCLC: a multicohort study
Source: PubMed Central journal article supplement — J Immunother Cancer. 2020 Jun 30;8(1):e000381. doi: 10.1136/jitc-2019-000381 (PMC7328897; doi:10.1136/jitc-2019-000381), 2020-06-30
Supplement: jitc-2019-000381supp004.pdf [file jitc-2019-000381supp004.pdf]

Fig.S1

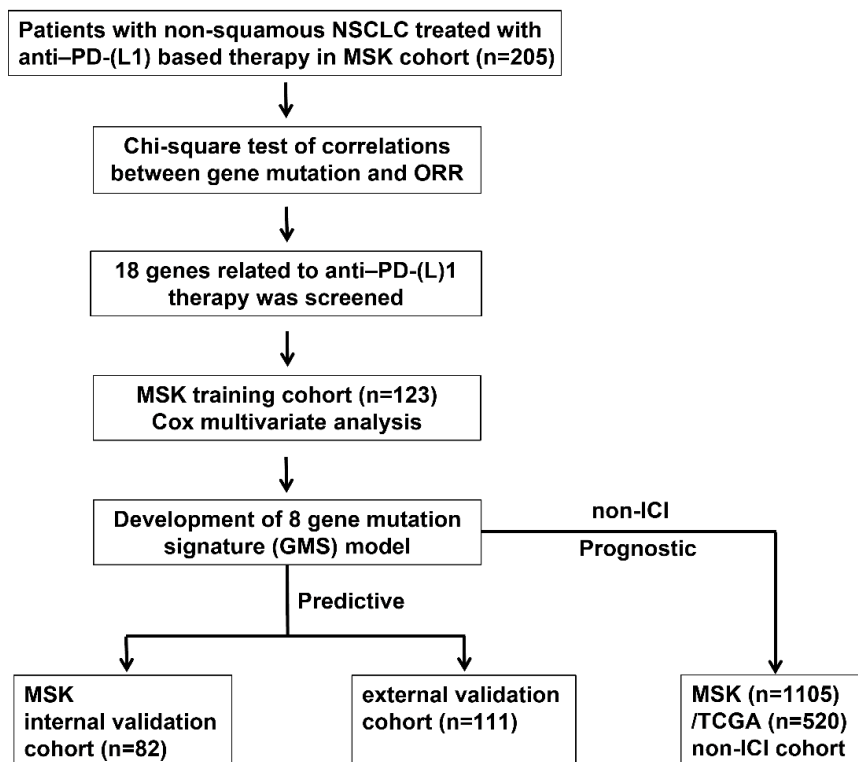

**Fig S1. Flowchart of the procedures in the development and validation of gene mutation-based signature.**
