# Supplementary material for: Development and validation of a genomic mutation signature to predict response to PD-1 inhibitors in non-squamous NSCLC: a multicohort study
Source: PubMed Central journal article supplement — J Immunother Cancer. 2020 Jun 30;8(1):e000381. doi: 10.1136/jitc-2019-000381 (PMC7328897; doi:10.1136/jitc-2019-000381), 2020-06-30
Supplement: jitc-2019-000381supp005.pdf [file jitc-2019-000381supp005.pdf]

**Table S3.** Mutation frequency of GMS genes in three nonsquamous non-small cell lung cancer cohorts treated with anti-PD-(L)1 based therapy.

|                        | Cohorts     |                     |                     | Chi-Square<br><i>P</i> value |
|------------------------|-------------|---------------------|---------------------|------------------------------|
|                        | Training    | Internal validation | External validation |                              |
| <b>No. of patients</b> | 123         | 82                  | 111                 |                              |
| <b>EGFR</b>            |             |                     |                     |                              |
| Wild type              | 105 (85.4%) | 75 (91.5%)          | 92 (82.9%)          | 0.225                        |
| Mutation               | 18 (14.6%)  | 7 (8.5%)            | 19 (17.1%)          |                              |
| <b>HGF</b>             |             |                     |                     |                              |
| Wild type              | 115 (93.5%) | 74 (90.2%)          | 106 (95.5%)         | 0.349                        |
| Mutation               | 8 (6.5%)    | 8 (9.8%)            | 5 (4.5%)            |                              |
| <b>KRAS</b>            |             |                     |                     |                              |
| Wild type              | 73 (59.3%)  | 46 (56.1%)          | 73 (65.8%)          | 0.365                        |
| Mutation               | 50 (40.7%)  | 36 (43.9%)          | 38 (34.2%)          |                              |
| <b>MLL3</b>            |             |                     |                     |                              |
| Wild type              | 108 (87.8%) | 74 (90.2%)          | 98 (88.3%)          | 0.858                        |
| Mutation               | 15 (12.2%)  | 8 (9.8%)            | 13 (11.7%)          |                              |
| <b>PTPRD</b>           |             |                     |                     |                              |
| Wild type              | 105 (85.4%) | 72 (87.8%)          | 101 (91%)           | 0.417                        |
| Mutation               | 18 (14.6%)  | 10 (12.2%)          | 10 (9%)             |                              |
| <b>SMAD4</b>           |             |                     |                     |                              |
| Wild type              | 117 (95.1%) | 77 (93.9%)          | 108 (97.3%)         | 0.502                        |
| Mutation               | 6 (4.9%)    | 5 (6.1%)            | 3 (2.7%)            |                              |
| <b>STK11</b>           |             |                     |                     |                              |
| Wild type              | 95 (77.2%)  | 59 (72%)            | 94 (84.7%)          | 0.095                        |
| Mutation               | 28 (22.8%)  | 23 (28%)            | 17 (15.3%)          |                              |
| <b>TP53</b>            |             |                     |                     |                              |
| Wild type              | 55 (44.7%)  | 37 (45.1%)          | 57 (51.4%)          | 0.545                        |
| Mutation               | 68 (55.3%)  | 45 (54.9%)          | 54 (48.6%)          |                              |
