# Supplementary material for: Development and validation of a genomic mutation signature to predict response to PD-1 inhibitors in non-squamous NSCLC: a multicohort study
Source: PubMed Central journal article supplement — J Immunother Cancer. 2020 Jun 30;8(1):e000381. doi: 10.1136/jitc-2019-000381 (PMC7328897; doi:10.1136/jitc-2019-000381), 2020-06-30

Fig.S8

**A** Three-gene model (MLL3, SMAD4, HGF)

— Low — High

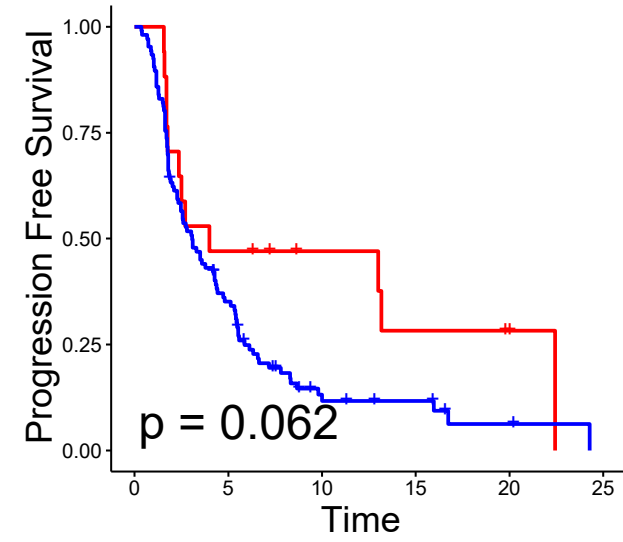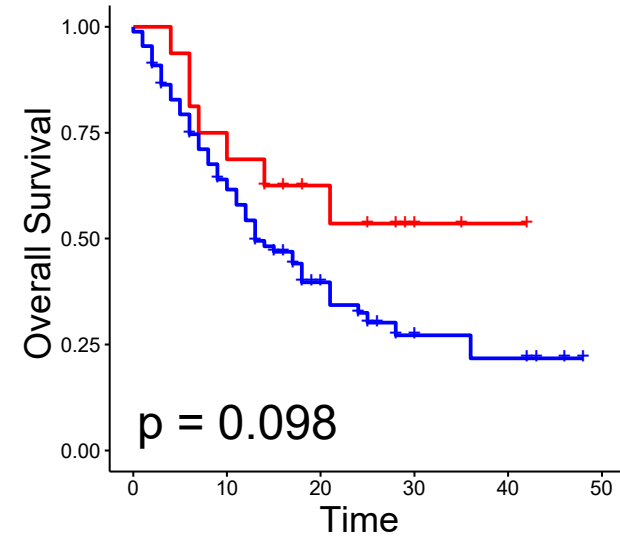

Training Cohort

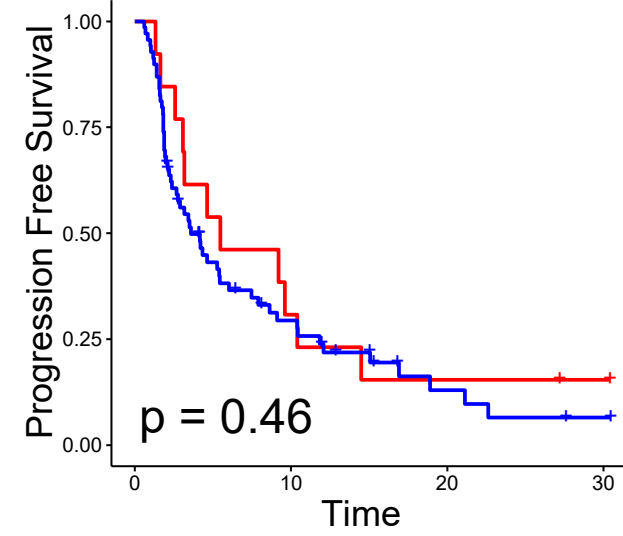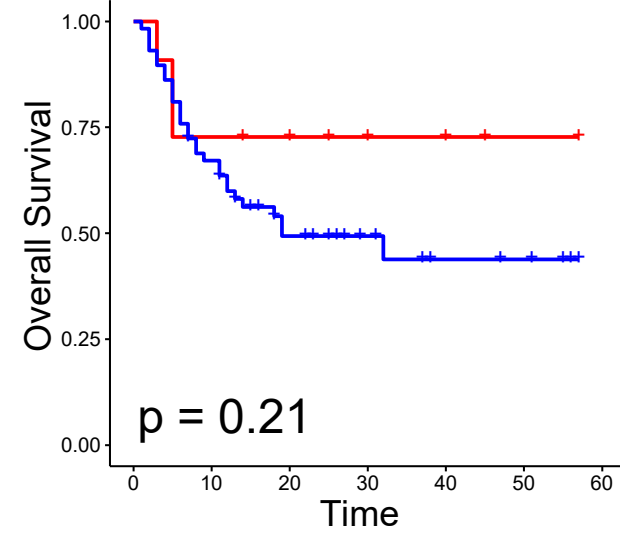

Internal Validation Cohort

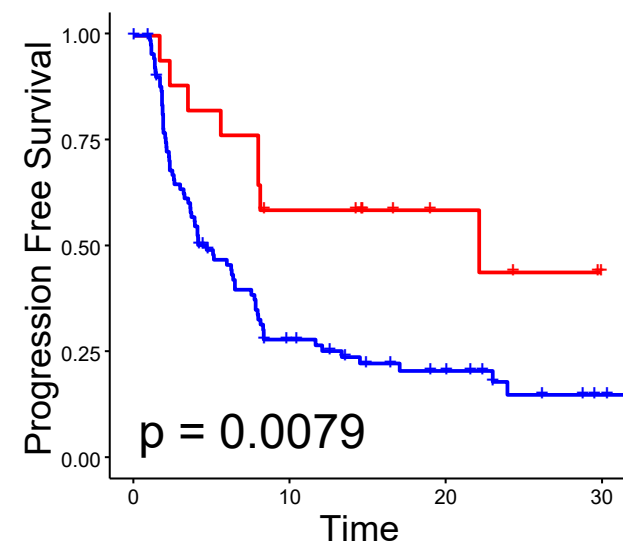

External Validation Cohort

**B** Four-gene model (TP53, KRAS, EGFR, STK11)

— Low — High

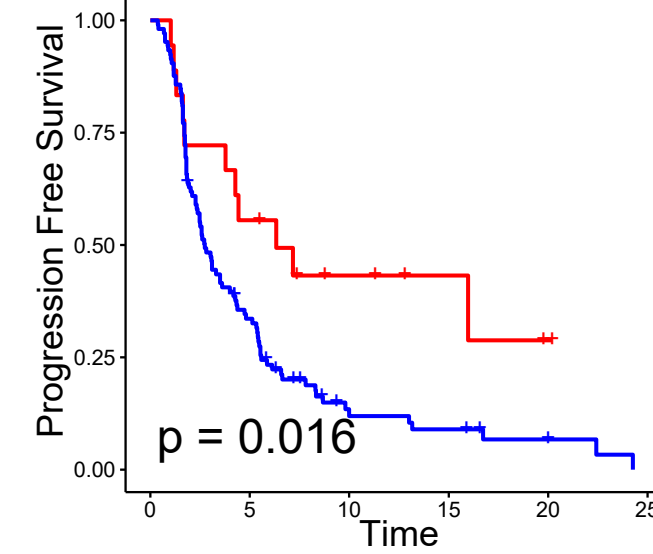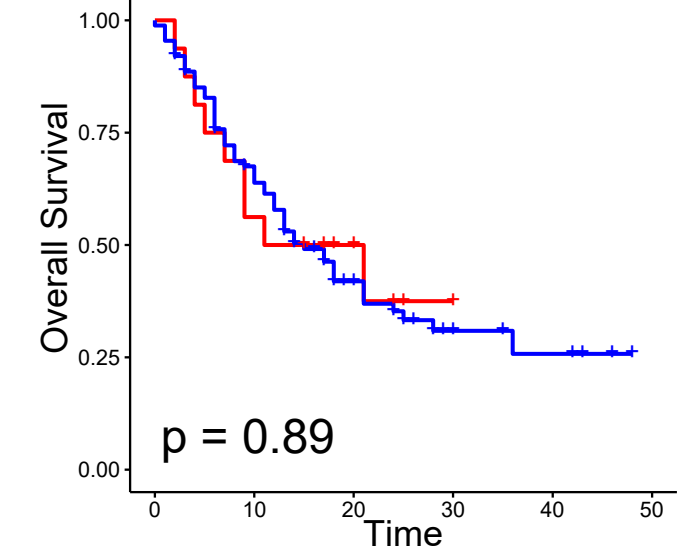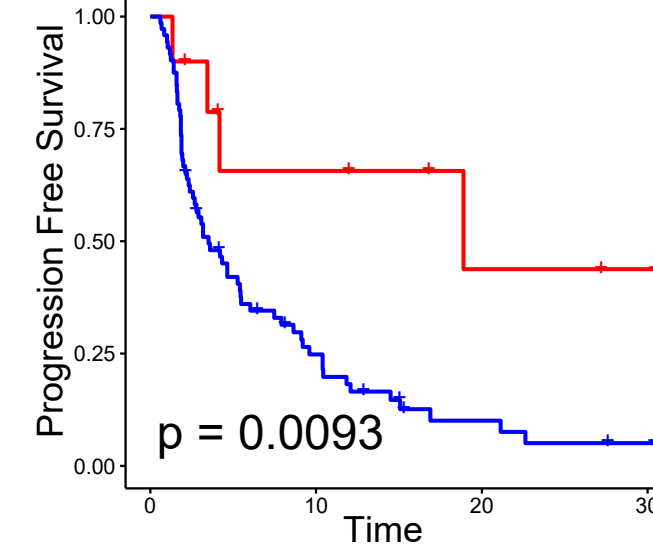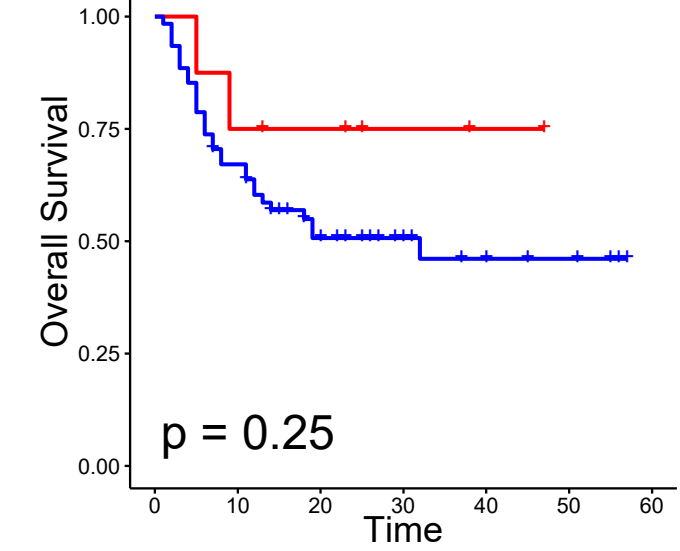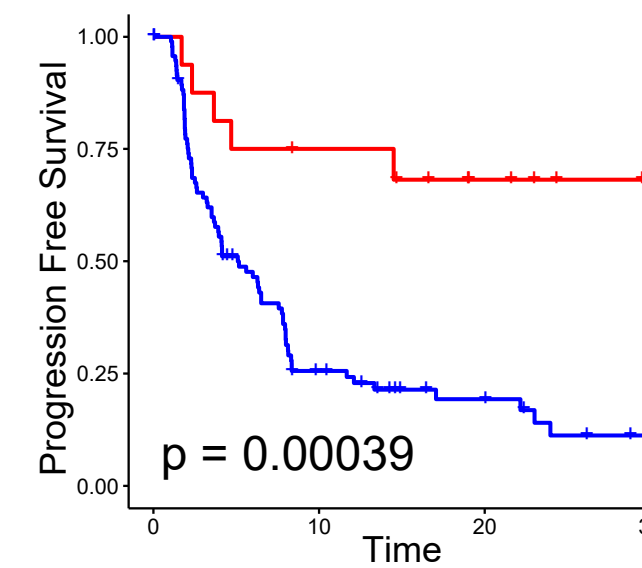

Supplement: jitc-2019-000381supp012.pdf [file jitc-2019-000381supp012.pdf]
