# Supplementary material for: Development and validation of a genomic mutation signature to predict response to PD-1 inhibitors in non-squamous NSCLC: a multicohort study
Source: PubMed Central journal article supplement — J Immunother Cancer. 2020 Jun 30;8(1):e000381. doi: 10.1136/jitc-2019-000381 (PMC7328897; doi:10.1136/jitc-2019-000381), 2020-06-30
Supplement: jitc-2019-000381supp013.pdf [file jitc-2019-000381supp013.pdf]

**Table S4.** Hazard ratios with 95% confidence interval of models developed with reducing gene members of GMS in three nonsquamous non-small cell lung cancer cohorts.

| Genes for modeling                        | PFS                        |                            |                            | OS                         |                            |
|-------------------------------------------|----------------------------|----------------------------|----------------------------|----------------------------|----------------------------|
|                                           | Training                   | Internal validation        | External validation        | Training                   | Internal validation        |
| HGF-SMAD4-MLL3-KRAS-STK11-EGFR-PTPRD-TP53 | <b>0.41</b><br>(0.28,0.61) | <b>0.42</b><br>(0.25,0.69) | <b>0.31</b><br>(0.20,0.48) | <b>0.53</b><br>(0.32,0.89) | <b>0.26</b><br>(0.13,0.54) |
| HGF-SMAD4-MLL3-KRAS-STK11-EGFR-PTPRD      | 0.51<br>(0.35,0.75)        | 0.49<br>(0.3,0.8)          | 0.38<br>(0.25,0.59)        | 0.56<br>(0.34,0.91)        | 0.30<br>(0.15,0.6)         |
| HGF-SMAD4-MLL3-KRAS-STK11-EGFR            | 0.58<br>(0.39,0.85)        | 0.54<br>(0.33,0.87)        | 0.50<br>(0.32,0.77)        | 0.65<br>(0.4,1.07)         | 0.33<br>(0.16,0.66)        |
| HGF-SMAD4-MLL3-KRAS-STK11                 | 0.60<br>(0.41,0.88)        | 0.54<br>(0.33,0.87)        | 0.50<br>(0.32,0.77)        | 0.65<br>(0.4,1.07)         | 0.33<br>(0.16,0.66)        |
| HGF-SMAD4-MLL3-KRAS                       | 0.65<br>(0.44,0.96)        | 0.86<br>(0.53,1.4)         | 0.67<br>(0.43,1.04)        | 0.77<br>(0.47,1.26)        | 0.62<br>(0.31,1.25)        |
| HGF-SMAD4-MLL3                            | 0.58<br>(0.35,0.95)        | 0.79<br>(0.43,1.43)        | 0.39<br>(0.23,0.66)        | 0.53<br>(0.28,0.99)        | 0.48<br>(0.19,1.19)        |

Abbreviations: GMS, genomic mutation signature; PFS, progression free survival; OS, overall survival.
