# Supplementary figures and images for: Development and validation of a genomic mutation signature to predict response to PD-1 inhibitors in non-squamous NSCLC: a multicohort study
Source: PubMed Central journal article supplement — J Immunother Cancer. 2020 Jun 30;8(1):e000381. doi: 10.1136/jitc-2019-000381 (PMC7328897; doi:10.1136/jitc-2019-000381), 2020-06-30

A

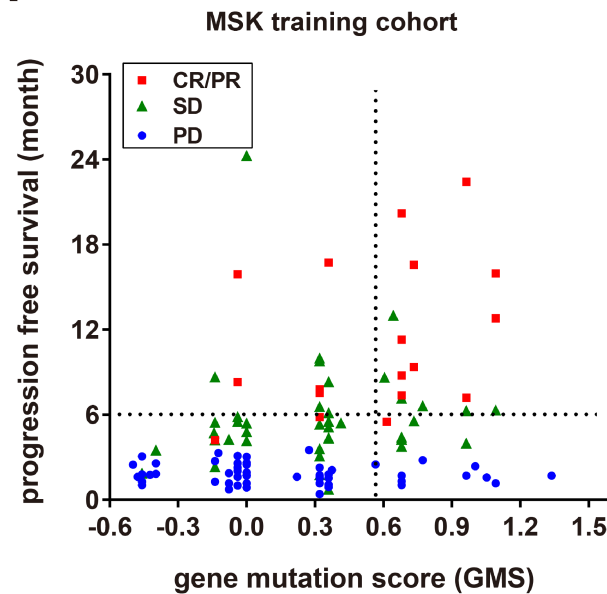

B

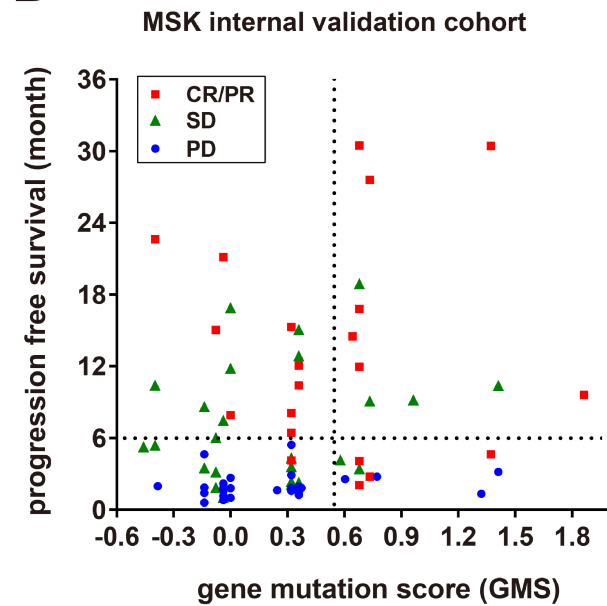

Supplement: jitc-2019-000381supp006.pdf [file jitc-2019-000381supp006.pdf]

## Fig. S3

A

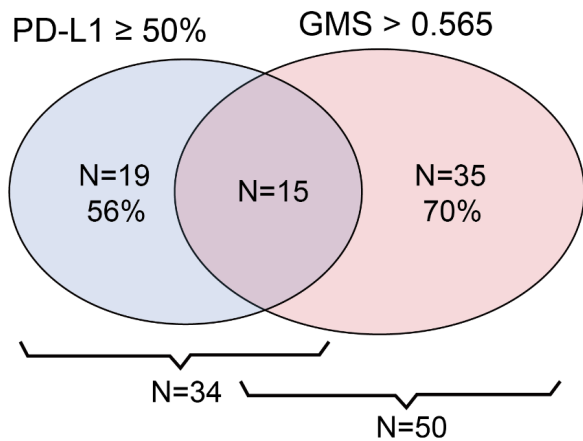

B

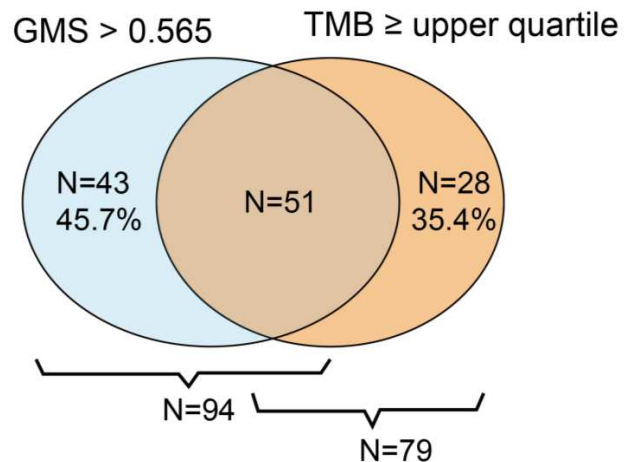

Supplement: jitc-2019-000381supp007.pdf [file jitc-2019-000381supp007.pdf]

Fig.S4

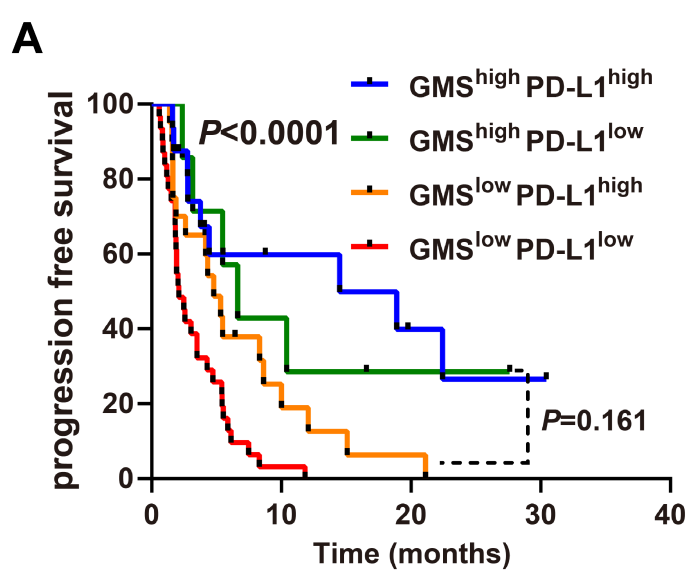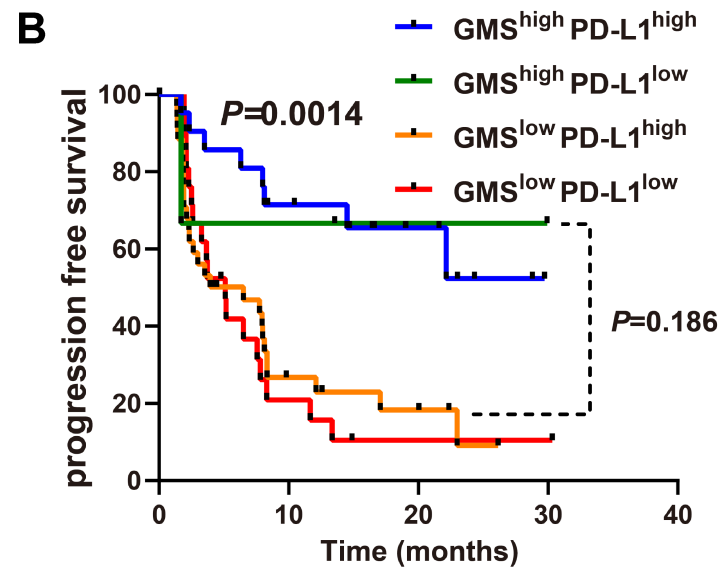

Supplement: jitc-2019-000381supp008.pdf [file jitc-2019-000381supp008.pdf]

**A**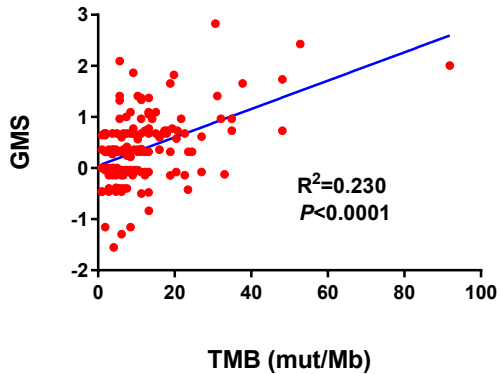**B**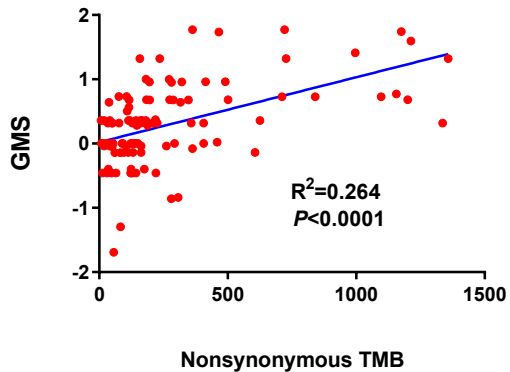

Supplement: jitc-2019-000381supp009.pdf [file jitc-2019-000381supp009.pdf]

A

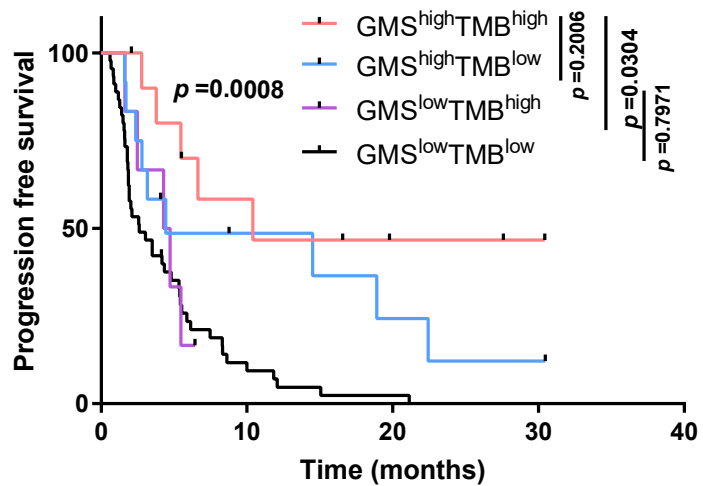

B

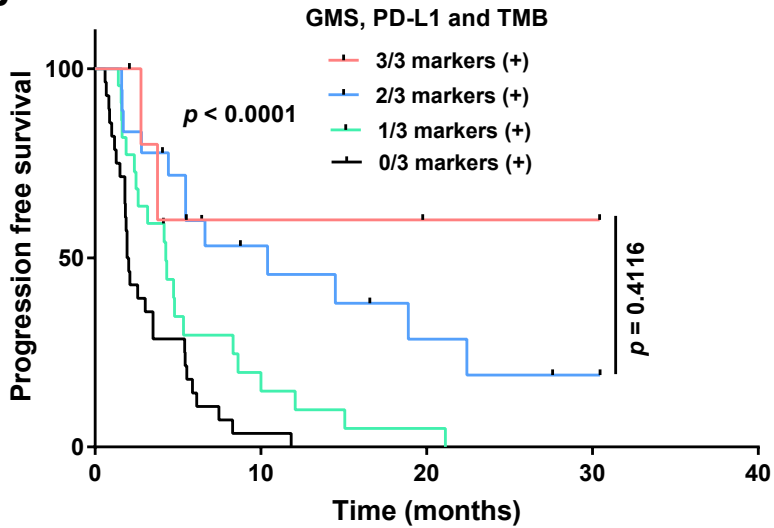

Supplement: jitc-2019-000381supp010.pdf [file jitc-2019-000381supp010.pdf]

## Fig.S7

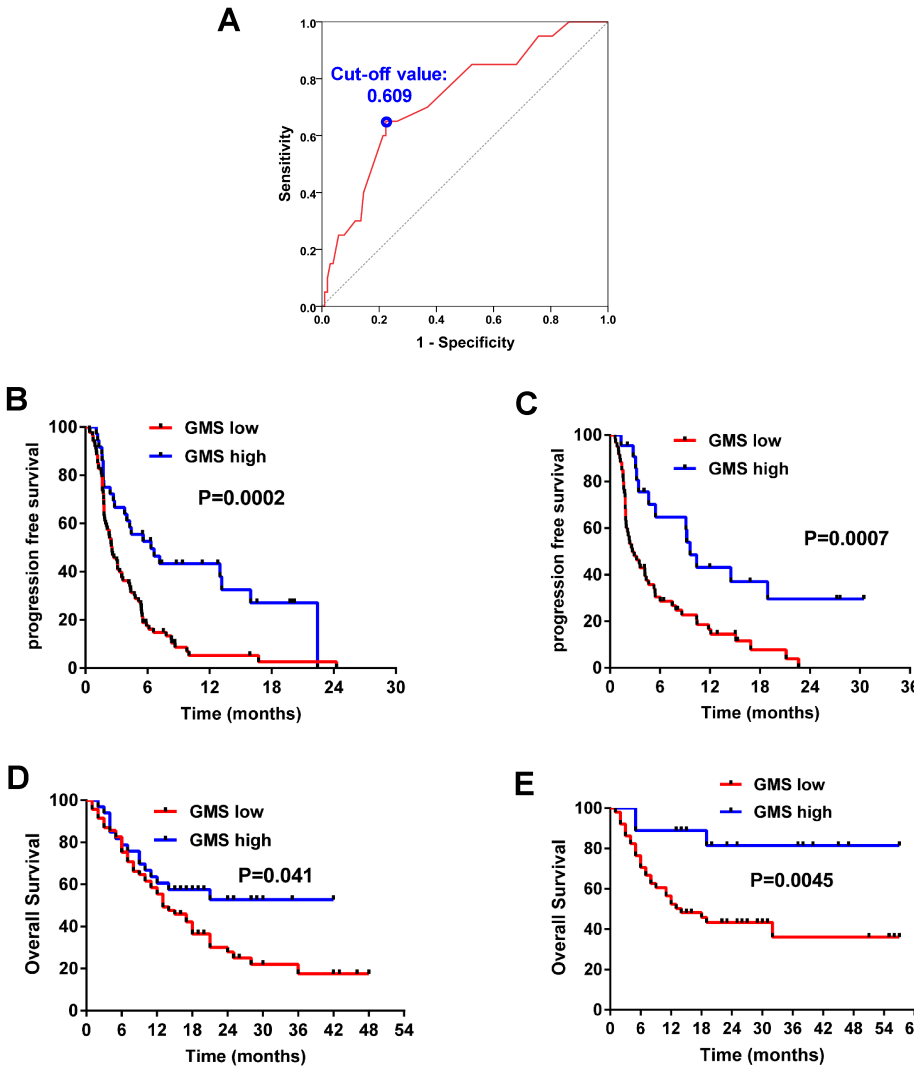

Supplement: jitc-2019-000381supp011.pdf [file jitc-2019-000381supp011.pdf]

Fig.S9

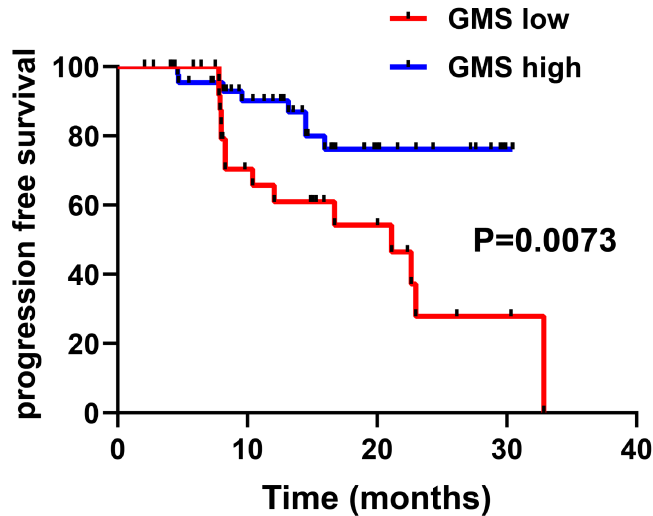

Supplement: jitc-2019-000381supp015.pdf [file jitc-2019-000381supp015.pdf]
